# Supplementary material for: Facile synthesis of large-area manganese oxide nanorod arrays as a high-performance electrochemical supercapacitor
Source: Royal Society of Chemistry journal article supplement (doi:10.1039/c1ee01338f), 2011-01-01
Supplement: c1ee01338f.pdf [file c1ee01338f.pdf]

## Supporting Information

# Facile Synthesis of Large-area Manganese Oxide Nanorod Arrays as High-Performance Electrochemical Supercapacitor

Xihong Lu,<sup>a</sup> Dezhou Zheng,<sup>a</sup> Teng Zhai,<sup>a</sup> Zhaoqing Liu,<sup>a, b</sup> Yunyun Huang,<sup>a</sup> Shilei Xie,<sup>a</sup>  
Yexiang Tong<sup>\*a</sup>

<sup>a</sup>MOE Laboratory of Bioinorganic and Synthetic Chemistry, School of Chemistry and Chemical Engineering, Institute of Optoelectronic and Functional Composite Materials, Sun Yat-sen University, Guangzhou 510275, P. R. China

<sup>b</sup>School of Chemistry and Chemical Engineering, Guangzhou University, Guangzhou 510006, China

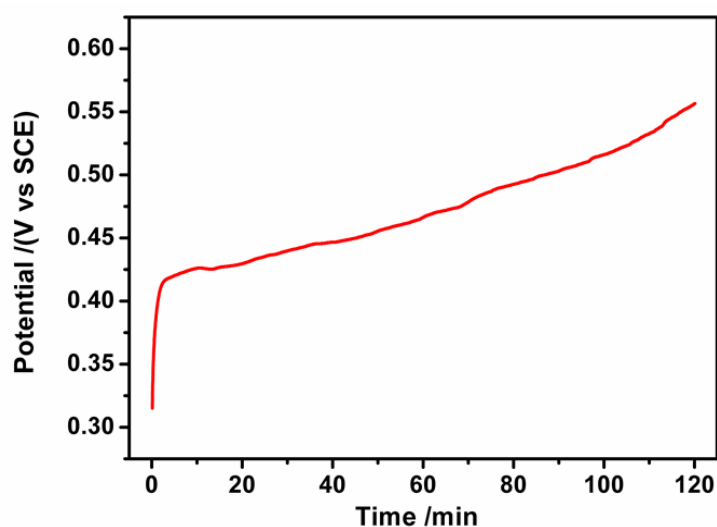

**Fig. S1** Potential-time curve of MONRAs grown on FTO substrates prepared in solution of 0.01 M MnAc<sub>2</sub> + 0.02 M NH<sub>4</sub>Ac + 10% DMSO with a current density of 0.2 mA cm<sup>-2</sup> for 120 min at 70 °C.

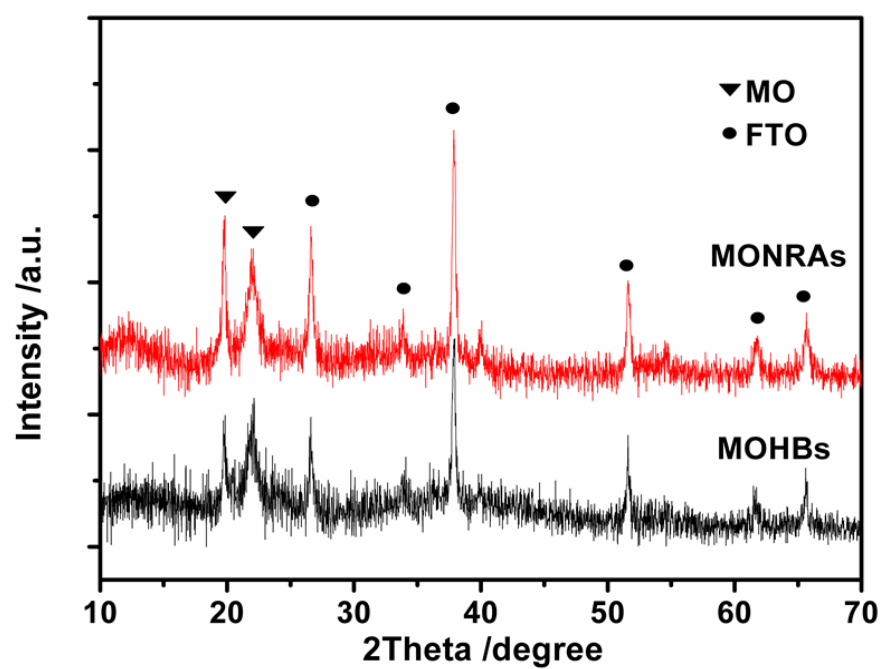

**Fig. S2** XRD patterns of MONRAs and MOHBs.

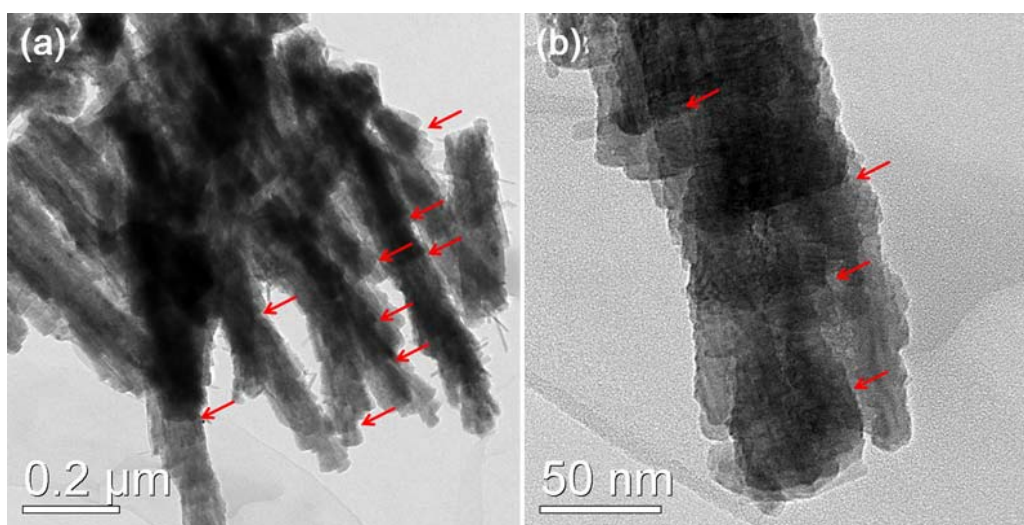

**Fig. S3** TEM images of the MONRs.

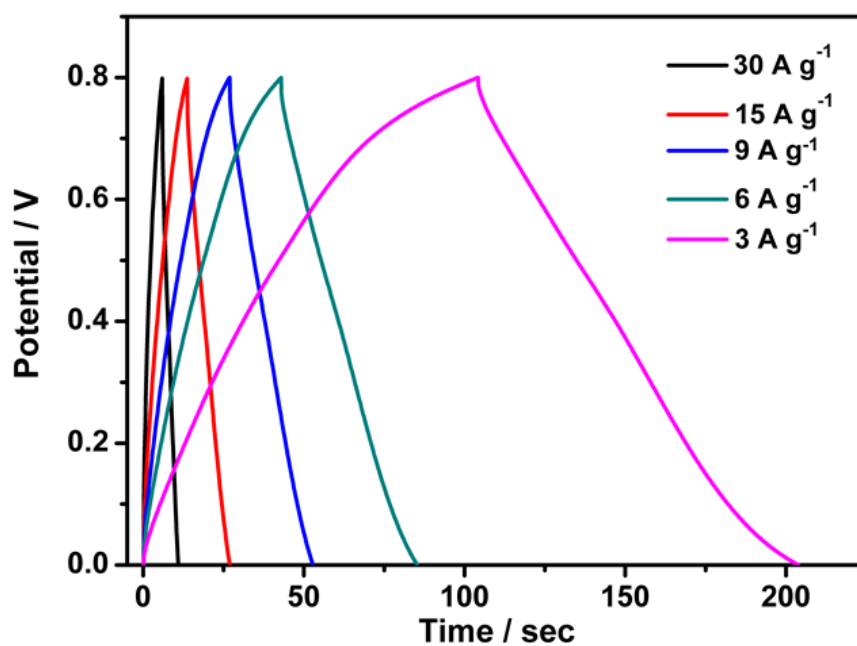

**Fig. S4** Galvanostatic current charge/discharge curves of the as-prepared MOHBs at different current density.

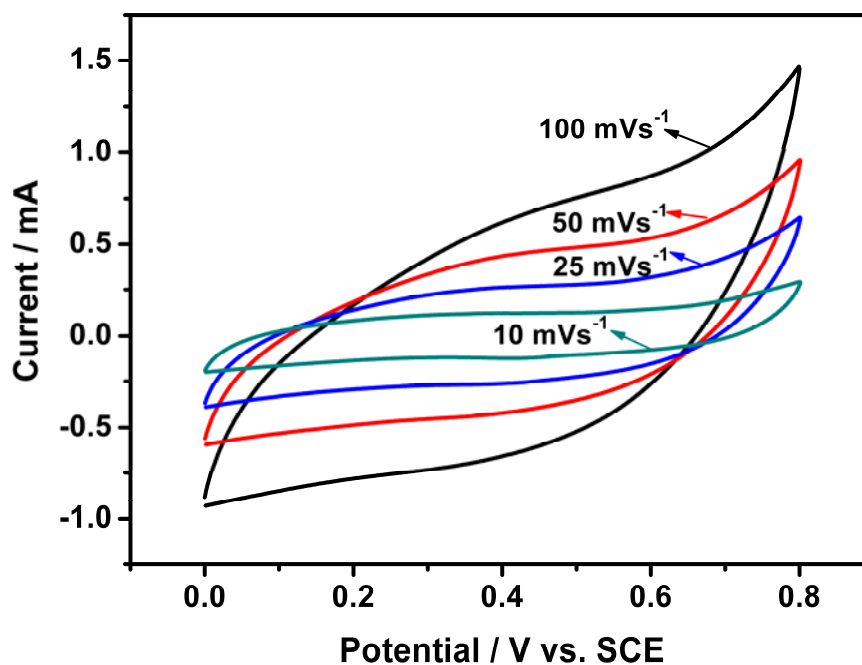

**Fig. S5** Cyclic voltammetry curves of the MONRs grown on Ti substrates at different scan rates in 0.5 M Na<sub>2</sub>SO<sub>4</sub> aqueous solution.
